# Supplementary material for: Identification of Potent Inhibitors Targeting EGFR and HER3 for Effective Treatment of Chemoresistance in Non-Small Cell Lung Cancer
Source: MDPI journal article supplement (doi:10.3390/molecules28124850), 2023-06-19
Supplement: s1 [file s1]

# **Identification of Potent Inhibitors Targeting EGFR and HER3 for Effective Treatment of Chemoresistance in Non-Small Cell Lung Cancer**

Ayed A. Dera <sup>1</sup>, Sumera Zaib <sup>2,\*</sup>, Areeba <sup>2</sup>, Nadia Hussain <sup>3,4</sup>, Nehal Rana <sup>2</sup>, Hira Javed <sup>2</sup> and Imtiaz Khan <sup>5,\*</sup>

<sup>1</sup>Department of Clinical Laboratory Sciences, College of Applied Medical Sciences, King Khalid University, Abha, Saudi Arabia

<sup>2</sup>Department of Basic and Applied Chemistry, Faculty of Science and Technology, University of Central Punjab, Lahore 54590, Pakistan

<sup>3</sup>Department of Pharmaceutical Sciences, College of Pharmacy, Al Ain University, Al Ain P.O. Box 64141, United Arab Emirates

<sup>4</sup>AAU Health and Biomedical Research Center, Al Ain University, Abu Dhabi P.O. Box 144534, United Arab Emirates

<sup>5</sup>Department of Chemistry and Manchester Institute of Biotechnology, The University of Manchester, 131 Princess Street, Manchester M1 7DN, United Kingdom

\*Correspondence: sumera.zaib@ucp.edu.pk (S.Z.); kimtiaz@hotmail.co.uk (I.K.)

**Table S1:** EFGR reported inhibitors.

| No. | Analog Structures                                                                   | No. | Analog Structures                                                                    |
|-----|-------------------------------------------------------------------------------------|-----|--------------------------------------------------------------------------------------|
| 1   | 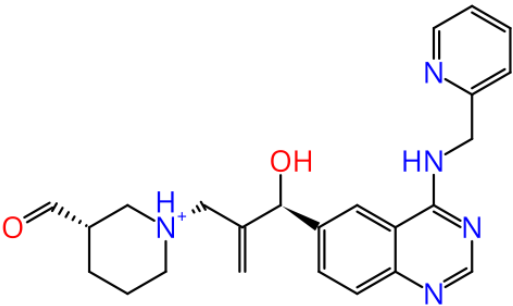   | 2   |   |
| 3   |    | 4   |    |
| 5   |   | 6   |   |
| 7   |  | 8   |  |
| 9   |  | 10  |  |

|    |  |    |  |
|----|--|----|--|
| 11 |  | 12 |  |
| 13 |  | 14 |  |
| 15 |  | 16 |  |
| 17 |  | 18 |  |
| 19 |  | 20 |  |
| 21 |  | 22 |  |

|    |                                                                                     |    |                                                                                      |
|----|-------------------------------------------------------------------------------------|----|--------------------------------------------------------------------------------------|
| 23 | 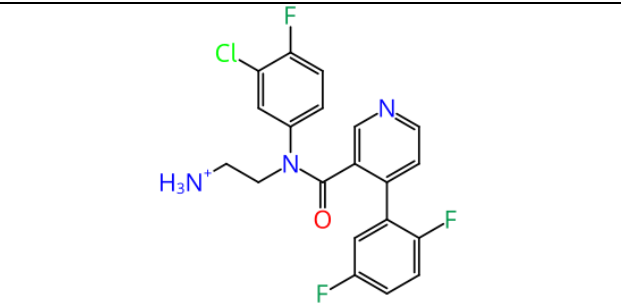    | 24 |     |
| 25 |    | 26 |    |
| 27 |    | 28 |    |
| 29 |   | 30 |   |
| 31 |  | 32 |  |
| 33 |  | 34 |  |
| 35 |  | 36 |  |
| 37 |  | 38 |  |



|    |                                                                                     |    |                                                                                       |
|----|-------------------------------------------------------------------------------------|----|---------------------------------------------------------------------------------------|
| 39 | 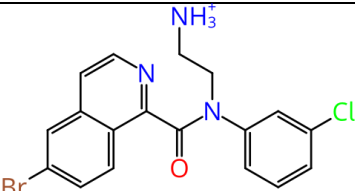    | 40 |     |
| 41 |    | 42 |     |
| 43 |    | 44 |     |
| 45 |   | 46 |     |
| 47 |  | 48 |   |
| 49 |  | 50 |   |
| 51 |  | 52 |  |
| 53 |  | 54 |   |

|    |                                                                                     |    |                                                                                       |
|----|-------------------------------------------------------------------------------------|----|---------------------------------------------------------------------------------------|
| 55 | 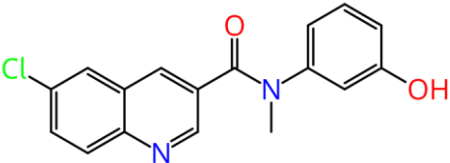   | 56 |      |
| 57 |    | 58 |     |
| 59 |    | 60 |    |
| 61 |    | 62 |     |
| 63 |   | 64 |   |
| 65 |  | 66 |  |
| 67 |  | 68 |   |

|    |                                                                                     |    |                                                                                      |
|----|-------------------------------------------------------------------------------------|----|--------------------------------------------------------------------------------------|
| 69 | 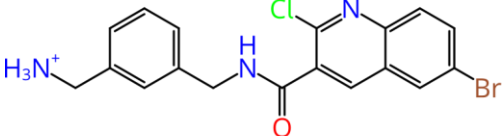   | 70 |    |
| 71 |    | 72 |   |
| 73 |    | 74 |    |
| 75 |   | 76 |   |
| 77 |  | 78 |  |
| 79 |  | 80 |  |
| 81 |  | 82 |  |

|    |                                                                                     |    |                                                                                       |
|----|-------------------------------------------------------------------------------------|----|---------------------------------------------------------------------------------------|
| 83 | 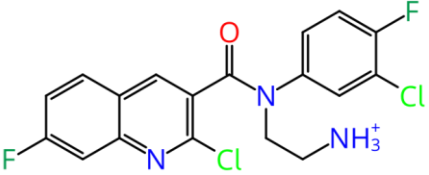   | 84 |    |
| 85 |    | 86 |     |
| 87 |    | 88 |     |
| 89 |   | 90 |    |
| 91 |  | 92 |  |
| 93 |  | 94 |   |
| 95 |  | 96 |  |

|     |                                                                                     |     |                                                                                       |
|-----|-------------------------------------------------------------------------------------|-----|---------------------------------------------------------------------------------------|
| 97  | 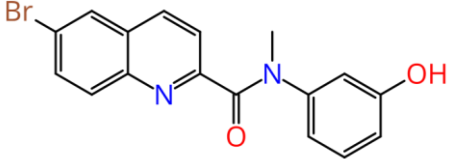   | 98  |     |
| 99  |    | 100 |     |
| 101 |    | 102 |     |
| 103 |   | 104 |    |
| 105 |  | 106 |  |
| 107 |  | 108 |   |

|     |  |     |  |
|-----|--|-----|--|
| 109 |  | 110 |  |
| 111 |  | 112 |  |
| 113 |  | 114 |  |
| 115 |  | 116 |  |
| 117 |  | 118 |  |

|     |                                                                                     |     |                                                                                      |
|-----|-------------------------------------------------------------------------------------|-----|--------------------------------------------------------------------------------------|
| 119 | 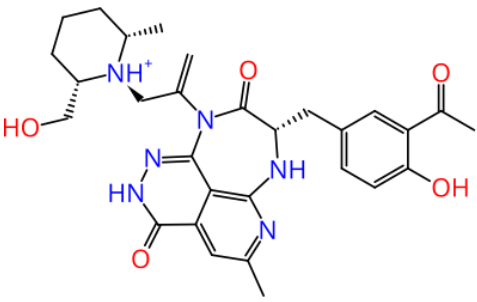   | 120 |    |
| 121 |    | 122 |    |
| 123 |   | 124 |   |
| 125 |  | 126 |  |
| 127 |  | 128 |  |

|     |                                                                                     |     |                                                                                      |
|-----|-------------------------------------------------------------------------------------|-----|--------------------------------------------------------------------------------------|
| 129 | 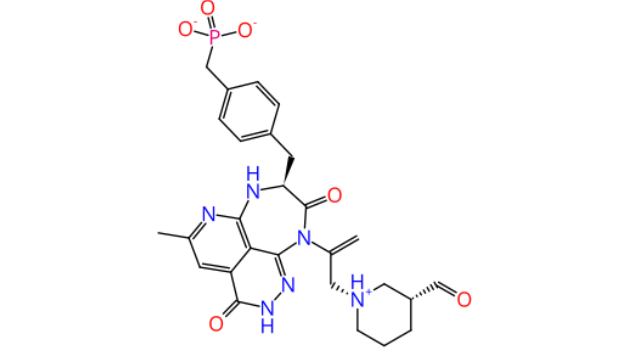   | 130 |    |
| 131 |    | 132 |    |
| 133 |   | 134 |   |
| 135 |  | 136 |  |
| 137 |  | 138 |  |



|     |                                                                                     |     |                                                                                      |
|-----|-------------------------------------------------------------------------------------|-----|--------------------------------------------------------------------------------------|
| 139 | 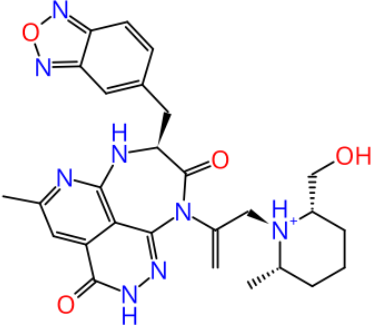   | 140 |    |
| 141 |    | 142 |    |
| 143 |   | 144 |   |
| 145 |  | 146 |  |

|     |  |     |  |
|-----|--|-----|--|
| 147 |  | 148 |  |
| 149 |  | 150 |  |
| 151 |  | 152 |  |
| 153 |  | 154 |  |
| 155 |  | 156 |  |

|     |                                                                                     |     |                                                                                      |
|-----|-------------------------------------------------------------------------------------|-----|--------------------------------------------------------------------------------------|
| 157 | 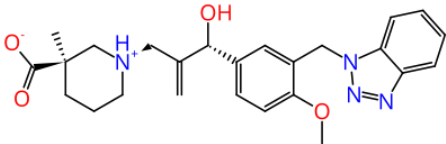   | 158 |    |
| 159 |    | 160 |    |
| 161 |   | 162 |   |
| 163 |  | 164 |  |

|     |                                                                                     |     |                                                                                      |
|-----|-------------------------------------------------------------------------------------|-----|--------------------------------------------------------------------------------------|
| 165 | 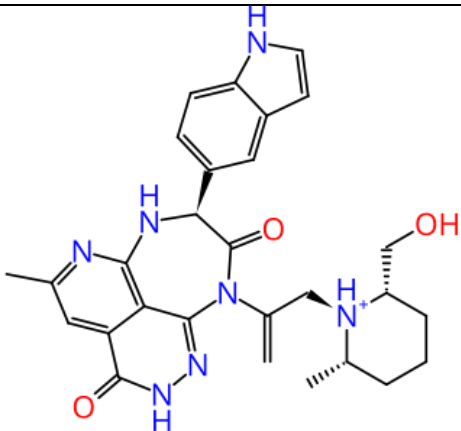    | 166 |    |
| 167 |    | 168 |    |
| 169 |   | 170 |   |
| 171 |  | 172 |  |

|     |  |     |  |
|-----|--|-----|--|
| 173 |  | 174 |  |
| 175 |  | 176 |  |
| 177 |  | 178 |  |
| 179 |  | 180 |  |
| 181 |  | 182 |  |

|     |                                                                                     |     |                                                                                       |
|-----|-------------------------------------------------------------------------------------|-----|---------------------------------------------------------------------------------------|
| 183 | 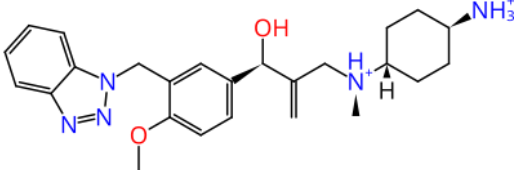   | 184 |     |
| 185 |    | 186 |     |
| 187 |   | 188 |     |
| 189 |  | 190 |  |
| 191 |  | 192 |  |
| 193 |  | 194 |   |

|     |                                                                                     |     |                                                                                      |
|-----|-------------------------------------------------------------------------------------|-----|--------------------------------------------------------------------------------------|
| 195 | 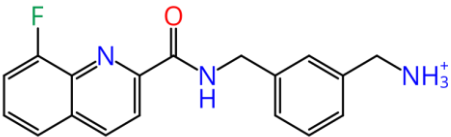   | 196 |    |
| 197 |    | 198 |    |
| 199 |    | 200 |    |
| 201 |   | 202 |    |
| 203 |  | 204 |  |
| 205 |  | 206 |  |
| 207 |  | 208 |  |
| 209 |  | 210 |  |

|     |                                                                                     |     |                                                                                       |
|-----|-------------------------------------------------------------------------------------|-----|---------------------------------------------------------------------------------------|
| 211 | 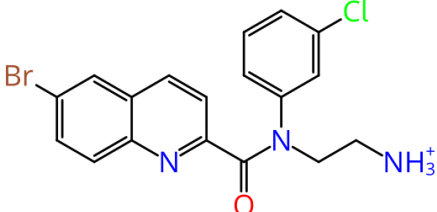   | 212 |    |
| 213 |    | 214 |     |
| 215 |    | 216 |     |
| 217 |   | 218 |    |
| 219 |  | 220 |   |
| 221 |  | 222 |   |
| 223 |  | 224 |  |
| 225 |  | 226 |   |



|     |                                                                                     |     |                                                                                       |
|-----|-------------------------------------------------------------------------------------|-----|---------------------------------------------------------------------------------------|
| 227 | 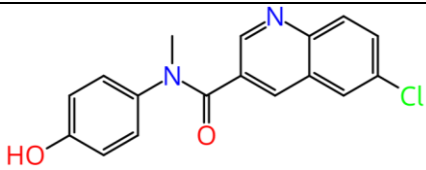    | 228 |      |
| 229 |    | 230 |     |
| 231 |    | 232 |     |
| 233 |   | 234 |     |
| 235 |  | 236 |  |
| 237 |  | 238 |   |
| 239 |  | 240 |   |

|     |                                                                                     |     |                                                                                       |
|-----|-------------------------------------------------------------------------------------|-----|---------------------------------------------------------------------------------------|
| 241 | 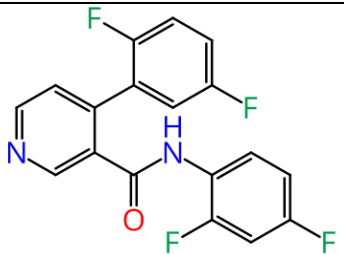    | 242 |      |
| 243 |    | 244 |     |
| 245 |    | 246 |     |
| 247 |   | 248 |    |
| 249 |  | 250 |   |
| 251 |  | 252 |   |
| 253 |  | 254 |   |
| 255 |  | 256 |  |

|     |  |     |  |
|-----|--|-----|--|
| 257 |  | 258 |  |
| 259 |  | 260 |  |
| 261 |  | 262 |  |
| 263 |  | 264 |  |
| 265 |  | 266 |  |
| 267 |  | 268 |  |
| 269 |  | 270 |  |
| 271 |  | 272 |  |

|     |                                                                                     |     |                                                                                       |
|-----|-------------------------------------------------------------------------------------|-----|---------------------------------------------------------------------------------------|
| 273 | 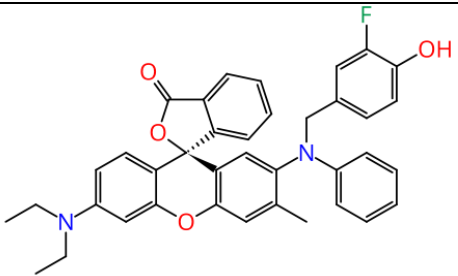    | 274 |      |
| 275 |    | 276 |     |
| 277 |   | 278 |    |
| 279 |  | 280 |   |
| 281 |  | 282 |  |

|     |                                                                                     |     |                                                                                      |
|-----|-------------------------------------------------------------------------------------|-----|--------------------------------------------------------------------------------------|
| 283 | 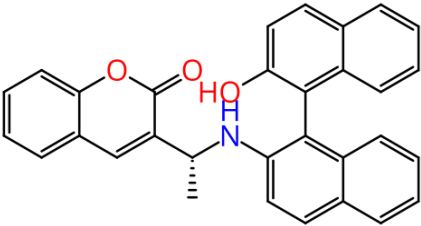   | 284 |    |
| 285 |    | 286 |    |
| 287 |   | 288 |    |
| 289 |  | 290 |  |
| 291 |  | 292 |  |

|     |                                                                                     |     |                                                                                      |
|-----|-------------------------------------------------------------------------------------|-----|--------------------------------------------------------------------------------------|
| 293 | 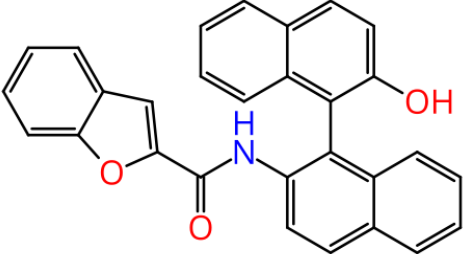   | 294 |    |
| 295 |    | 296 |    |
| 297 |    | 298 |   |
| 299 |  | 300 |  |
| 301 |  | 302 |  |
| 303 |  | 304 |  |

|     |                                                                                     |     |                                                                                      |
|-----|-------------------------------------------------------------------------------------|-----|--------------------------------------------------------------------------------------|
| 305 | 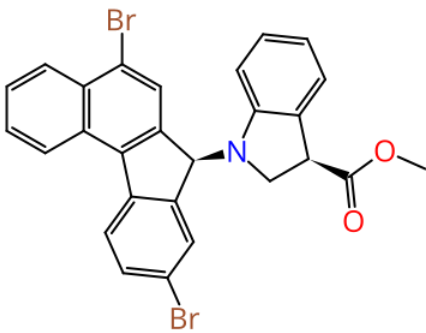   | 306 |    |
| 307 |    | 308 |   |
| 309 |   | 310 |  |
| 311 |  | 312 |  |
| 313 |  | 314 |  |
| 315 |  | 316 |  |

|     |  |     |  |
|-----|--|-----|--|
| 317 |  | 318 |  |
| 319 |  | 320 |  |
| 321 |  | 322 |  |
| 323 |  | 324 |  |
| 325 |  | 326 |  |



|     |                                                                                     |     |                                                                                       |
|-----|-------------------------------------------------------------------------------------|-----|---------------------------------------------------------------------------------------|
| 327 | 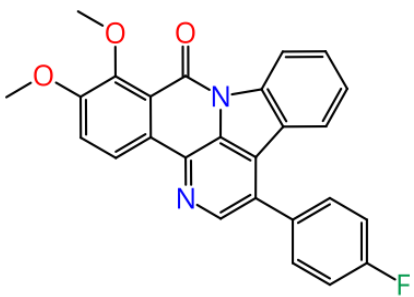   | 328 |     |
| 329 |    | 330 |     |
| 331 |   | 332 |     |
| 333 |  | 334 |  |
| 335 |  | 336 |   |

|     |                                                                                     |     |                                                                                      |
|-----|-------------------------------------------------------------------------------------|-----|--------------------------------------------------------------------------------------|
| 337 | 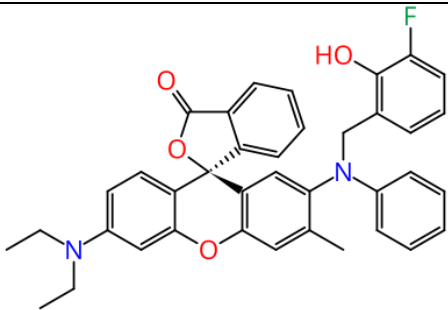    | 338 |     |
| 339 |    | 340 |   |
| 341 |   | 342 |    |
| 343 |  | 344 |  |
| 345 |  | 346 |  |

|     |                                                                                     |     |                                                                                       |
|-----|-------------------------------------------------------------------------------------|-----|---------------------------------------------------------------------------------------|
| 347 | 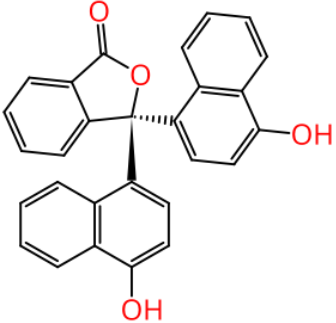   | 348 |     |
| 349 |    | 350 |     |
| 351 |   | 352 |     |
| 353 |  | 354 |   |
| 355 |  | 356 |  |

|     |                                                                                     |     |                                                                                      |
|-----|-------------------------------------------------------------------------------------|-----|--------------------------------------------------------------------------------------|
| 357 | 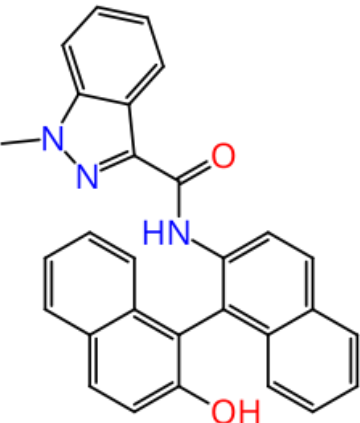   | 358 |     |
| 359 |    | 360 |    |
| 361 |   | 362 |  |
| 363 |  | 364 |  |
| 365 |  | 366 |  |

|     |                                                                                     |     |                                                                                      |
|-----|-------------------------------------------------------------------------------------|-----|--------------------------------------------------------------------------------------|
| 367 | 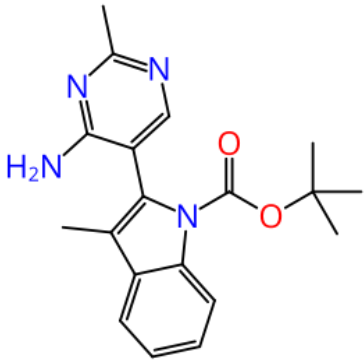   | 368 |   |
| 369 |    | 370 |   |
| 371 |   | 372 |   |
| 373 |  | 374 |  |
| 375 |  | 376 |  |

|     |  |     |  |
|-----|--|-----|--|
| 377 |  | 378 |  |
| 379 |  | 380 |  |
| 381 |  | 382 |  |
| 383 |  | 384 |  |
| 385 |  | 386 |  |
| 387 |  | 388 |  |

|     |                                                                                     |     |                                                                                       |
|-----|-------------------------------------------------------------------------------------|-----|---------------------------------------------------------------------------------------|
| 389 | 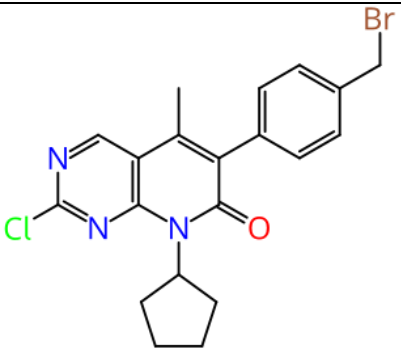    | 390 |      |
| 391 |    | 392 |    |
| 393 |   | 394 |    |
| 395 |  | 396 |   |
| 397 |  | 398 |  |

|     |                                                                                     |     |                                                                                       |
|-----|-------------------------------------------------------------------------------------|-----|---------------------------------------------------------------------------------------|
| 399 | 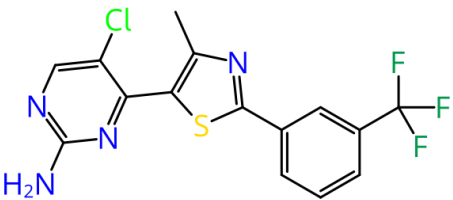   | 400 |    |
| 401 |    | 402 |     |
| 403 |   | 404 |   |
| 405 |  | 406 |   |
| 407 |  | 408 |  |



|     |                                                                                     |     |                                                                                       |
|-----|-------------------------------------------------------------------------------------|-----|---------------------------------------------------------------------------------------|
| 409 | 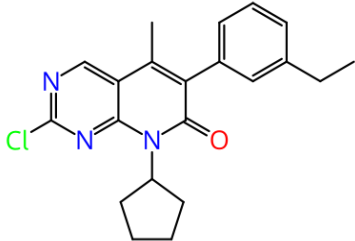   | 410 |     |
| 411 |    | 412 |    |
| 413 |   | 414 |    |
| 415 |  | 416 |  |
| 417 |  | 418 |  |

|     |                                                                                     |     |                                                                                       |
|-----|-------------------------------------------------------------------------------------|-----|---------------------------------------------------------------------------------------|
| 419 | 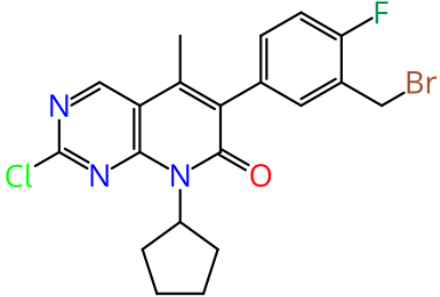   | 420 |    |
| 421 |    | 422 |     |
| 423 |    | 424 |    |
| 425 |  | 426 |   |
| 427 |  | 428 |   |
| 429 |  | 430 |  |

|     |                                                                                     |     |                                                                                       |
|-----|-------------------------------------------------------------------------------------|-----|---------------------------------------------------------------------------------------|
| 431 | 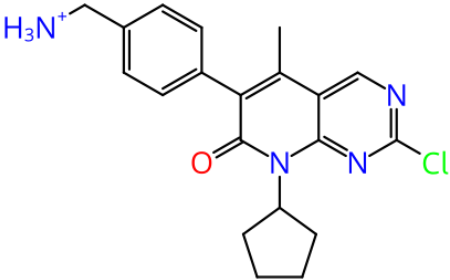   | 432 |     |
| 433 |    | 434 |     |
| 435 |   | 436 |    |
| 437 |  | 438 |   |
| 439 |  | 440 |  |

|     |                                                                                     |     |                                                                                      |
|-----|-------------------------------------------------------------------------------------|-----|--------------------------------------------------------------------------------------|
| 441 | 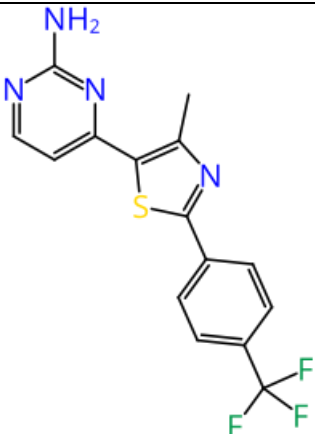    | 442 |     |
| 443 |    | 444 |    |
| 445 |   | 446 |   |
| 447 |  | 448 |  |
| 449 |  | 450 |  |

|     |                                                                                     |     |                                                                                      |
|-----|-------------------------------------------------------------------------------------|-----|--------------------------------------------------------------------------------------|
| 451 | 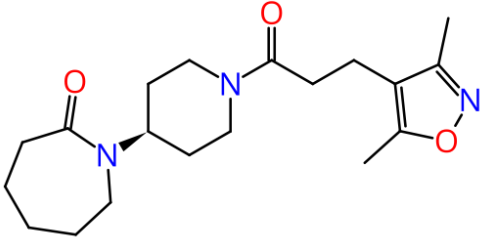   | 452 |    |
| 453 |    | 454 |    |
| 455 |    | 456 |    |
| 457 |   | 458 |   |
| 459 |  | 460 |  |
| 461 |  | 462 |  |
| 463 |  | 464 |  |

|     |                                                                                     |     |                                                                                       |
|-----|-------------------------------------------------------------------------------------|-----|---------------------------------------------------------------------------------------|
| 465 | 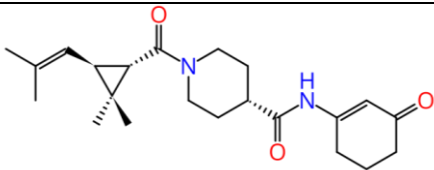    | 466 |      |
| 467 |    | 468 |     |
| 469 |    | 470 |    |
| 471 |   | 472 |    |
| 473 |  | 474 |  |
| 475 |  | 476 |  |
| 477 |  | 478 |  |

|     |                                                                                     |     |                                                                                       |
|-----|-------------------------------------------------------------------------------------|-----|---------------------------------------------------------------------------------------|
| 479 | 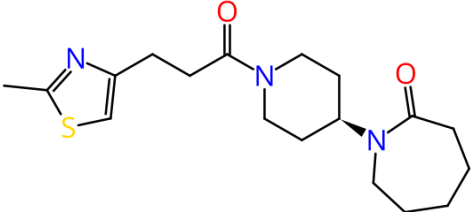   | 480 |     |
| 481 |    | 482 |     |
| 483 |    | 484 |     |
| 485 |   | 486 |    |
| 487 |  | 488 |  |
| 489 |  | 490 |   |
| 491 |  | 492 |   |





|     |                                                                                     |     |                                                                                      |
|-----|-------------------------------------------------------------------------------------|-----|--------------------------------------------------------------------------------------|
| 503 | 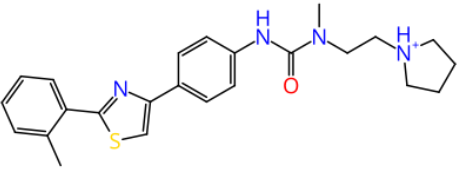   | 504 |    |
| 505 |    | 506 |    |
| 507 |   | 508 |   |
| 509 |  | 510 |  |
| 511 |  | 512 |  |
| 513 |  | 514 |  |

|     |                                                                                     |     |                                                                                       |
|-----|-------------------------------------------------------------------------------------|-----|---------------------------------------------------------------------------------------|
| 515 | 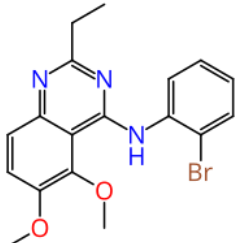   | 516 |    |
| 517 |    | 518 |    |
| 519 |    | 520 |    |
| 521 |   | 522 |   |
| 523 |  | 524 |  |
| 525 |  | 526 |   |

|     |  |     |  |
|-----|--|-----|--|
| 527 |  | 528 |  |
| 529 |  | 530 |  |
| 531 |  | 532 |  |
| 533 |  | 534 |  |
| 535 |  | 536 |  |
| 537 |  | 538 |  |

|     |                                                                                     |     |                                                                                       |
|-----|-------------------------------------------------------------------------------------|-----|---------------------------------------------------------------------------------------|
| 539 | 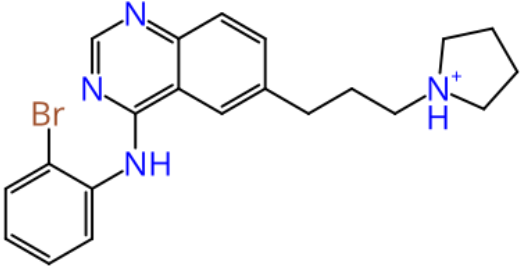   | 540 |     |
| 541 |    | 542 |     |
| 543 |    | 544 |     |
| 545 |  | 546 |   |
| 547 |  | 548 |  |
| 549 |  | 550 |  |

|     |                                                                    |     |                                                                        |
|-----|--------------------------------------------------------------------|-----|------------------------------------------------------------------------|
| 551 | <chem>Brc1ccc(Nc2nc(Nc3cc(F)cc(I)c3)c(Cl)n2)COc4ccccc4[NH+]</chem> | 552 | <chem>OC1=C(C2=CC=CC=C2N1C(=O)Nc3ccc(C(F)(F)F)cc3)C3CCCCC3[NH+]</chem> |
| 553 | <chem>Cc1cc(NC2=CN3C=CC=C(CCC[NH+]4CCCC4)C=C3N2)cc(O)c1</chem>     | 554 | <chem>Oc1cc(NC2=CN3C=CC=C(CCC[NH+]4CCCC4)C=C3N2)cc(F)c1</chem>         |
| 555 | <chem>Fc1cc(NC2=CN3C=CC=C(CCC[NH+]4CCCC4)C=C3N2)cc(Cl)c1</chem>    | 556 | <chem>Clc1cc(NC2=CN3C=CC=C(CCC[NH+]4CCCC4)C=C3N2)cc(Cl)c1</chem>       |
| 557 | <chem>Clc1cc(NC2=CN3C=CC=C(CCC[NH+]4CCCC4)C=C3N2)cc(Cl)c1</chem>   | 558 | <chem>Clc1cc(NC2=CN3C=CC=C(CCC[NH+]4CCCC4)C=C3N2)cc(Cl)c1</chem>       |
| 559 | <chem>Clc1cc(NC2=CN3C=CC=C(CCC[NH+]4CCCC4)C=C3N2)cc(Cl)c1</chem>   | 560 | <chem>OC1=C(C2=CC=CC=C2N1C(=O)Nc3ccc(Cl)cc3)C4CCCC4[NH+]</chem>        |
| 561 | <chem>OC1=C(C2=CC=CC=C2N1C(=O)Nc3ccc(Cl)cc3)C4CCCC4[NH+]</chem>    | 562 | <chem>OC1=C(C2=CC=CC=C2N1C(=O)Nc3ccc(Cl)cc3)C4CCCCC4[NH+]</chem>       |

|     |  |     |  |
|-----|--|-----|--|
| 563 |  | 564 |  |
| 565 |  | 566 |  |
| 567 |  | 568 |  |
| 569 |  | 570 |  |
| 571 |  | 572 |  |
| 573 |  | 574 |  |

|     |                                                                                     |     |                                                                                      |
|-----|-------------------------------------------------------------------------------------|-----|--------------------------------------------------------------------------------------|
| 575 | 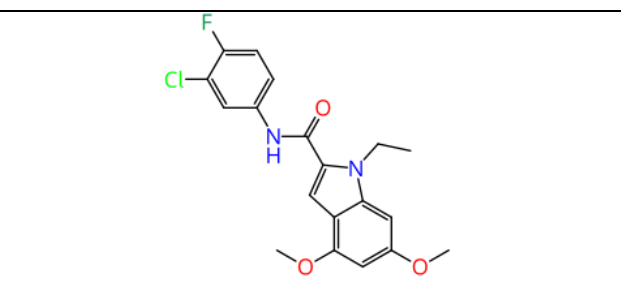    | 576 |     |
| 577 |    | 578 |    |
| 579 |   | 580 |   |
| 581 |  | 582 |  |
| 583 |  | 584 |  |

|     |                                                                                     |     |                                                                                      |
|-----|-------------------------------------------------------------------------------------|-----|--------------------------------------------------------------------------------------|
| 585 | 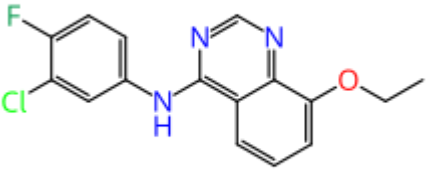   | 586 |    |
| 587 |    | 588 |    |
| 589 |   | 590 |   |
| 591 |  | 592 |  |
| 593 |  | 594 |  |



|     |                                                                                     |     |                                                                                       |
|-----|-------------------------------------------------------------------------------------|-----|---------------------------------------------------------------------------------------|
| 595 | 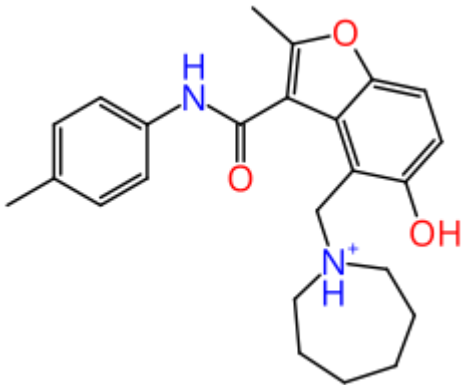   | 596 |      |
| 597 |    | 598 |    |
| 599 |   | 600 |   |
| 601 |  | 602 |  |

**Table S2:** EGFR inhibiting compounds generated from molecular editor and inspirator mode of SeeSAR via adding and replacing atoms and group of atoms. (The orange highlighted portion of compounds are representing fragments generated by ReCore).

| No | Structure of compounds                                                              | No | Structure of compounds                                                                |
|----|-------------------------------------------------------------------------------------|----|---------------------------------------------------------------------------------------|
| 2a | 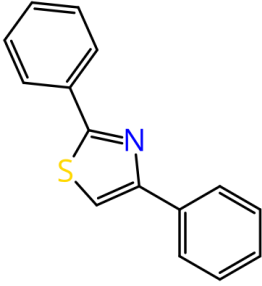   | 2b |    |
| 2c |    | 2d |   |
| 2e |  | 2f |  |
| 2g |  | 2h |  |

|    |                                                                                     |    |                                                                                       |
|----|-------------------------------------------------------------------------------------|----|---------------------------------------------------------------------------------------|
| 2i | 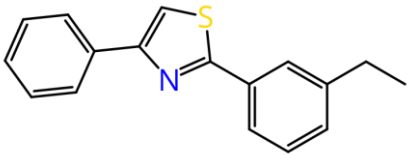   | 2j |    |
| 2k |    | 2l |     |
| 2m |    | 2n |     |
| 2o |   | 2p |    |
| 2q |  | 2r |   |
| 2s |  | 2t |  |

|    |                                                                                     |    |                                                                                       |
|----|-------------------------------------------------------------------------------------|----|---------------------------------------------------------------------------------------|
| 2u | 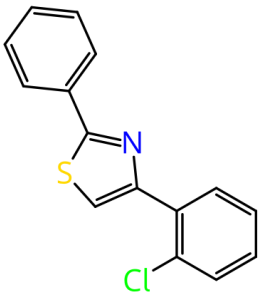   | 2v |    |
| 2w |    | 2x |     |
| 2y |   | 2z |    |
| 3a |  | 3b |  |
| 3c |  | 3d |  |
| 3e |  | 3f |   |

|    |                                                                                     |    |                                                                                       |
|----|-------------------------------------------------------------------------------------|----|---------------------------------------------------------------------------------------|
| 3g | 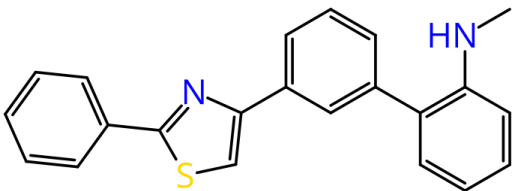   | 3h |     |
| 3i |    | 3j |     |
| 3k |    | 3l |     |
| 3m |    | 3n |     |
| 3o |   | 3p |    |
| 3q |  | 3r |   |
| 3s |  | 3t |  |
| 3u |  | 3v |  |

|    |                                                                                     |    |                                                                                      |
|----|-------------------------------------------------------------------------------------|----|--------------------------------------------------------------------------------------|
| 3w | 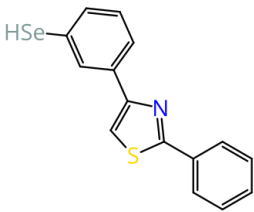   | 3x |   |
| 3y |    | 3z |    |
| 4a |    | 4b |    |
| 4c |    | 4d |    |
| 4e |   | 4f |   |
| 4g |  | 4h |  |
| 4i |  | 4j |  |

|    |                                                                                     |    |                                                                                       |
|----|-------------------------------------------------------------------------------------|----|---------------------------------------------------------------------------------------|
| 4k | 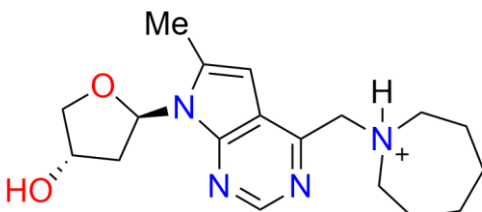   | 4l |    |
| 4m |    | 4n |     |
| 4o |   | 4p |   |
| 4q |  | 4r |  |
| 4s |  | 4t |   |

|    |                                                                                     |    |                                                                                      |
|----|-------------------------------------------------------------------------------------|----|--------------------------------------------------------------------------------------|
| 4u | 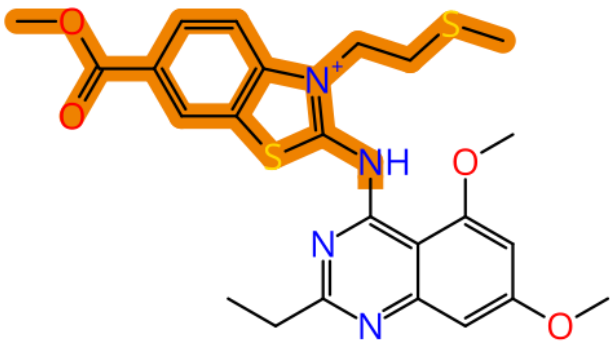   | 4v |    |
| 4w |    | 4x |   |
| 4y |    | 4z |  |
| 5a |  | 5b |  |
| 5c |  | 5d |  |



|    |  |    |  |
|----|--|----|--|
| 5e |  | 5f |  |
| 5g |  | 5h |  |
| 5i |  | 5j |  |
| 5k |  | 5l |  |
| 5m |  | 5n |  |

|    |                                                                                     |    |                                                                                      |
|----|-------------------------------------------------------------------------------------|----|--------------------------------------------------------------------------------------|
| 5o | 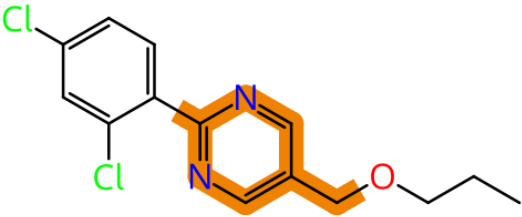   | 5p |    |
| 5q |    | 5r |   |
| 5s |   | 5t |  |
| 5u |  | 5v |  |
| 5w |  | 5x |  |

|    |                                                                                     |    |                                                                                      |
|----|-------------------------------------------------------------------------------------|----|--------------------------------------------------------------------------------------|
| 5y | 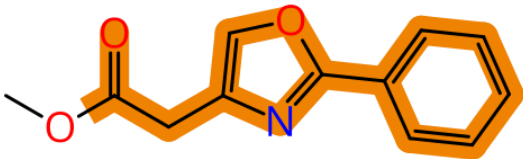   | 5z |    |
| 6a |    | 6b |    |
| 6c |   | 6d |  |
| 6e |  | 6f |  |
| 6g |  | 6h |  |

**Table S3.** HER3 reported inhibitor analogs.

| No | Analog Structures                                                                   | No | Analog Structures                                                                    |
|----|-------------------------------------------------------------------------------------|----|--------------------------------------------------------------------------------------|
| 1  | 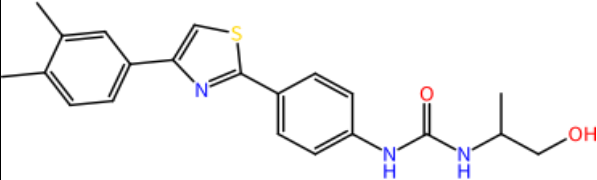   | 2  |    |
| 3  |    | 4  |    |
| 5  |   | 6  |  |
| 7  |  | 8  |  |
| 9  |  | 10 |  |

|    |  |    |  |
|----|--|----|--|
| 11 |  | 12 |  |
| 13 |  | 14 |  |
| 15 |  | 16 |  |
| 17 |  | 18 |  |
| 19 |  | 20 |  |
| 21 |  | 22 |  |

|    |                                                                                     |    |                                                                                      |
|----|-------------------------------------------------------------------------------------|----|--------------------------------------------------------------------------------------|
| 23 | 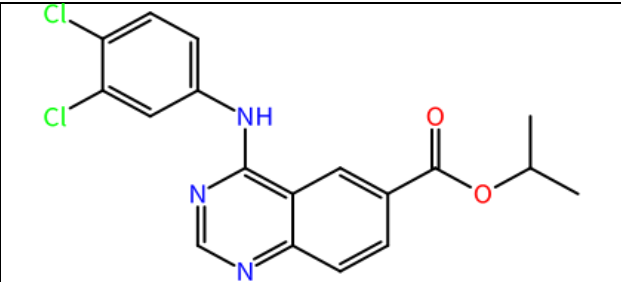    | 24 |     |
| 25 |    | 26 |    |
| 27 |    | 28 |    |
| 29 |  | 30 |  |
| 31 |  | 32 |  |
| 33 |  | 34 |  |

|    |                                                                                     |    |                                                                                      |
|----|-------------------------------------------------------------------------------------|----|--------------------------------------------------------------------------------------|
| 35 | 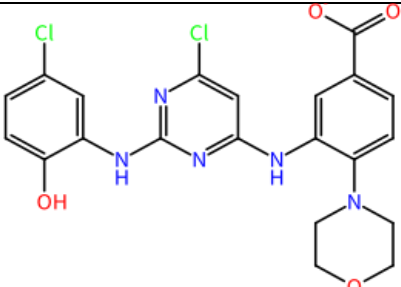    | 36 |    |
| 37 |    | 38 |    |
| 39 |   | 40 |   |
| 41 |  | 42 |  |
| 43 |  | 44 |  |

|    |                                                                                     |    |                                                                                      |
|----|-------------------------------------------------------------------------------------|----|--------------------------------------------------------------------------------------|
| 45 | 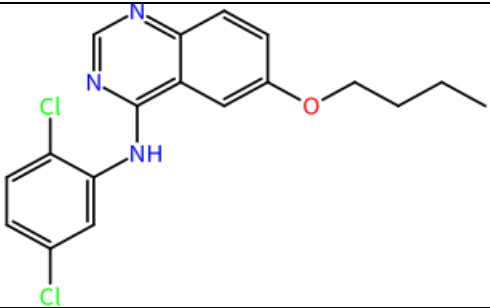    | 46 |     |
| 47 |    | 48 |    |
| 49 |   | 50 |    |
| 51 |  | 52 |  |
| 53 |  | 54 |  |
| 55 |  | 56 |  |



|    |                                                                                     |    |                                                                                       |
|----|-------------------------------------------------------------------------------------|----|---------------------------------------------------------------------------------------|
| 57 | 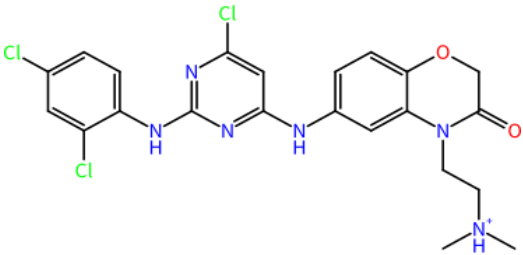   | 58 |     |
| 59 |    | 60 |     |
| 61 |    | 62 |     |
| 63 |   | 64 |    |
| 65 |  | 66 |  |
| 67 |  | 68 |  |

|    |                                                                                     |    |                                                                                      |
|----|-------------------------------------------------------------------------------------|----|--------------------------------------------------------------------------------------|
| 69 | 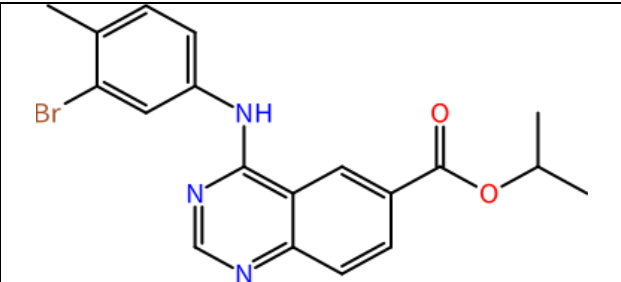    | 70 |     |
| 71 |    | 72 |    |
| 73 |   | 74 |   |
| 75 |  | 76 |  |
| 77 |  | 78 |  |
| 79 |  | 80 |  |

|    |  |    |  |
|----|--|----|--|
| 81 |  | 82 |  |
| 83 |  | 84 |  |
| 85 |  | 86 |  |
| 87 |  | 88 |  |
| 89 |  | 90 |  |
| 91 |  | 92 |  |

|     |                                                                                     |     |                                                                                      |
|-----|-------------------------------------------------------------------------------------|-----|--------------------------------------------------------------------------------------|
| 93  | 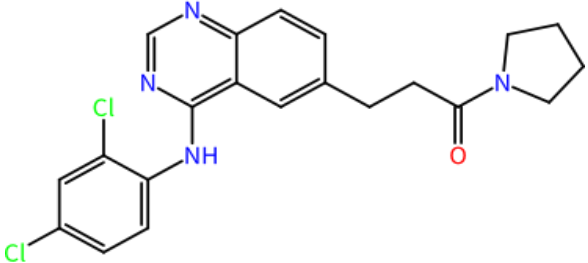   | 94  |     |
| 95  |    | 96  |    |
| 97  |   | 98  |   |
| 99  |  | 100 |  |
| 101 |  | 102 |  |
| 103 |  | 104 |  |

|     |                                                                                     |     |                                                                                       |
|-----|-------------------------------------------------------------------------------------|-----|---------------------------------------------------------------------------------------|
| 105 |    | 106 |     |
| 107 |    | 108 |     |
| 109 |    | 110 |     |
| 111 |   | 112 |    |
| 113 |  | 114 |   |
| 115 |  | 116 |  |

|     |                                                                                     |     |                                                                                       |
|-----|-------------------------------------------------------------------------------------|-----|---------------------------------------------------------------------------------------|
| 117 | 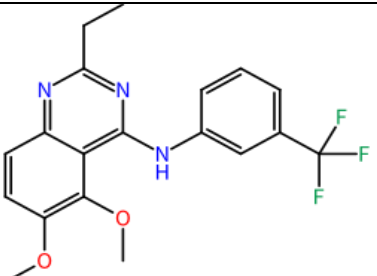    | 118 |      |
| 119 |    | 120 |    |
| 121 |    | 122 |    |
| 123 |   | 124 |   |
| 125 |  | 126 |  |
| 127 |  | 128 |   |

|     |                                                                                     |     |                                                                                       |
|-----|-------------------------------------------------------------------------------------|-----|---------------------------------------------------------------------------------------|
| 129 | 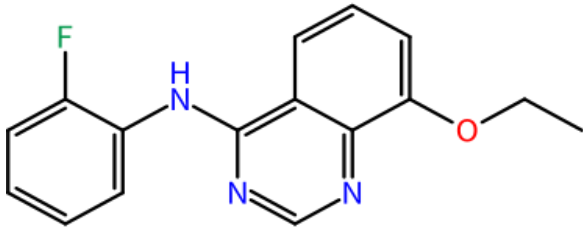   | 130 |      |
| 131 |    | 132 |    |
| 133 |    | 134 |     |
| 135 |  | 136 |  |
| 137 |  | 138 |  |
| 139 |  | 140 |   |

|     |                                                                                     |     |                                                                                      |
|-----|-------------------------------------------------------------------------------------|-----|--------------------------------------------------------------------------------------|
| 141 | 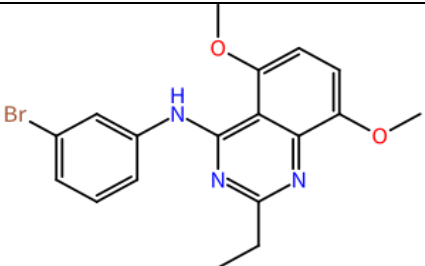    | 142 |    |
| 143 |    | 144 |   |
| 145 |    | 146 |   |
| 147 |  | 148 |  |
| 149 |  | 150 |  |
| 151 |  | 152 |  |



|     |                                                                                     |     |                                                                                       |
|-----|-------------------------------------------------------------------------------------|-----|---------------------------------------------------------------------------------------|
| 153 | 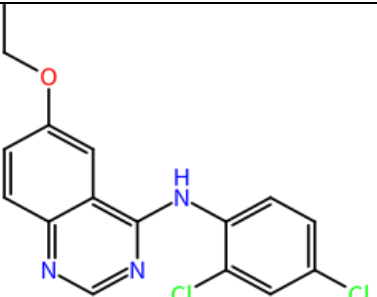    | 154 |     |
| 155 |    | 156 |    |
| 157 |    | 158 |     |
| 159 |   | 160 |   |
| 161 |  | 162 |  |
| 163 |  | 164 |   |

|     |  |     |  |
|-----|--|-----|--|
| 165 |  | 166 |  |
| 167 |  | 168 |  |
| 169 |  | 170 |  |
| 171 |  | 172 |  |
| 173 |  | 174 |  |
| 175 |  | 176 |  |

|     |                                                                                     |     |                                                                                       |
|-----|-------------------------------------------------------------------------------------|-----|---------------------------------------------------------------------------------------|
| 177 | 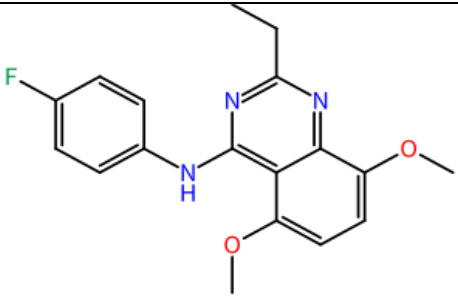    | 178 |    |
| 179 |    | 180 |    |
| 181 |   | 182 |   |
| 183 |  | 184 |  |
| 185 |  | 186 |  |

|     |                                                                                     |     |                                                                                       |
|-----|-------------------------------------------------------------------------------------|-----|---------------------------------------------------------------------------------------|
| 187 | 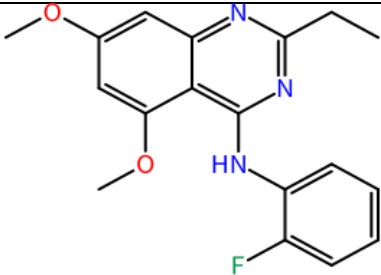    | 188 |     |
| 189 |    | 190 |    |
| 191 |   | 192 |    |
| 193 |  | 194 |  |
| 195 |  | 196 |  |

|     |                                                                                     |     |                                                                                      |
|-----|-------------------------------------------------------------------------------------|-----|--------------------------------------------------------------------------------------|
| 197 | 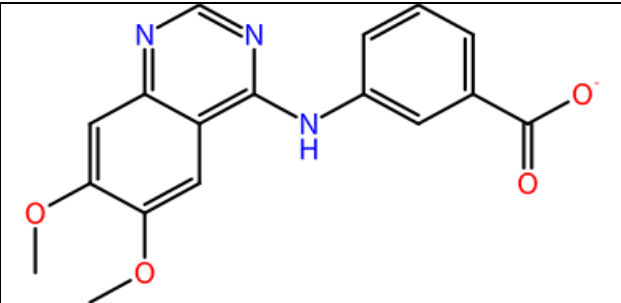    | 198 |     |
| 199 |    | 200 |    |
| 201 |   | 202 |   |
| 203 |  | 204 |  |
| 205 |  | 206 |  |
| 207 |  | 208 |  |

|     |                                                                                     |     |                                                                                      |
|-----|-------------------------------------------------------------------------------------|-----|--------------------------------------------------------------------------------------|
| 209 | 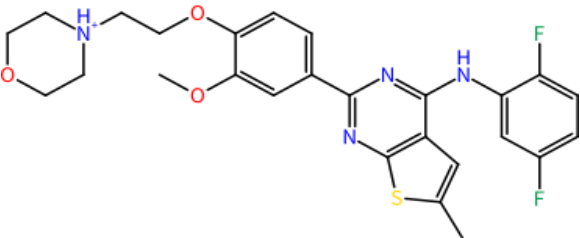   | 210 |    |
| 211 |    | 212 |    |
| 213 |   | 214 |   |
| 215 |  | 216 |  |
| 217 |  | 218 |  |

|     |                                                                                     |     |                                                                                      |
|-----|-------------------------------------------------------------------------------------|-----|--------------------------------------------------------------------------------------|
| 219 | 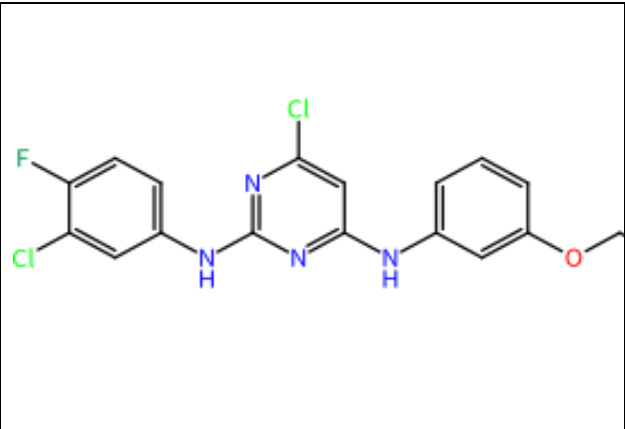    | 220 |     |
| 221 |    | 222 |    |
| 223 |   | 224 |   |
| 225 |  | 226 |  |
| 227 |  | 228 |  |
| 229 |  | 230 |  |

|     |  |     |  |
|-----|--|-----|--|
| 231 |  | 232 |  |
| 233 |  | 234 |  |
| 235 |  | 236 |  |
| 237 |  | 238 |  |
| 239 |  | 240 |  |
| 241 |  | 242 |  |



|     |                                                                                     |     |                                                                                      |
|-----|-------------------------------------------------------------------------------------|-----|--------------------------------------------------------------------------------------|
| 243 | 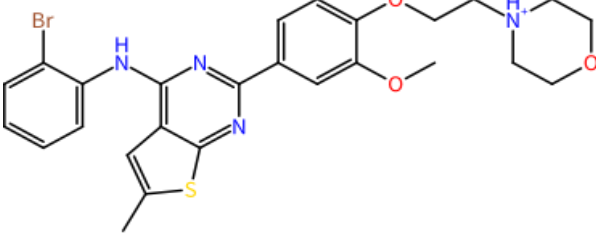   | 244 |    |
| 245 |    | 246 |    |
| 247 |    | 248 |    |
| 249 |  | 250 |  |
| 251 |  | 252 |  |
| 253 |  | 254 |  |

|     |                                                                                     |     |                                                                                      |
|-----|-------------------------------------------------------------------------------------|-----|--------------------------------------------------------------------------------------|
| 255 | 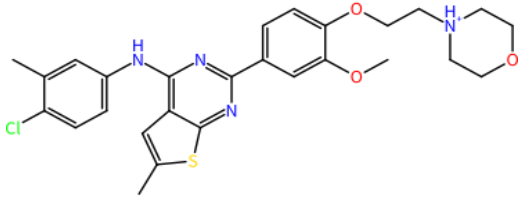   | 256 |    |
| 257 |    | 258 |   |
| 259 |    | 260 |    |
| 261 |   | 262 |   |
| 263 |  | 264 |  |
| 265 |  | 266 |  |

|     |                                                                                     |     |                                                                                      |
|-----|-------------------------------------------------------------------------------------|-----|--------------------------------------------------------------------------------------|
| 267 | 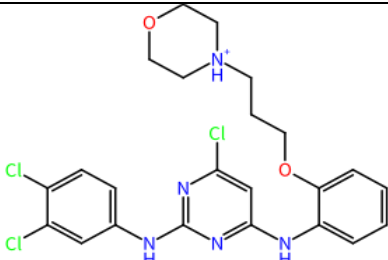    | 268 |    |
| 269 |    | 270 |    |
| 271 |    | 272 |    |
| 273 |   | 274 |   |
| 275 |  | 276 |  |

|     |                                                                                     |     |                                                                                       |
|-----|-------------------------------------------------------------------------------------|-----|---------------------------------------------------------------------------------------|
| 277 | 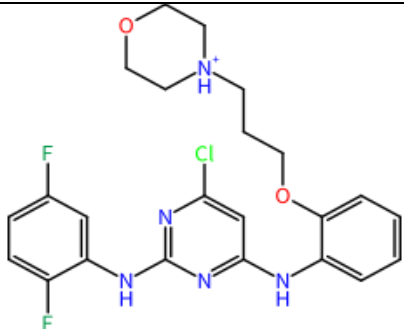    | 278 |     |
| 279 |    | 280 |     |
| 281 |    | 282 |     |
| 283 |   | 284 |   |
| 285 |  | 286 |  |
| 287 |  | 288 |  |

|     |                                                                                     |     |                                                                                      |
|-----|-------------------------------------------------------------------------------------|-----|--------------------------------------------------------------------------------------|
| 289 | 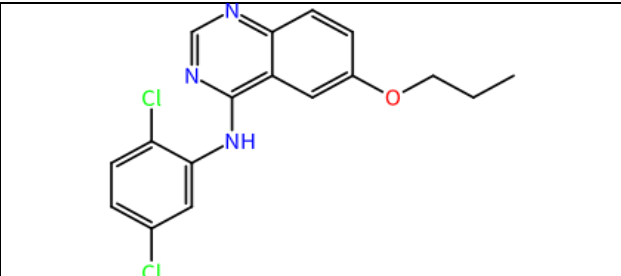    | 290 |     |
| 291 |    | 292 |    |
| 293 |    | 294 |    |
| 295 |   | 296 |   |
| 297 |  | 298 |  |
| 299 |  | 300 |  |

301

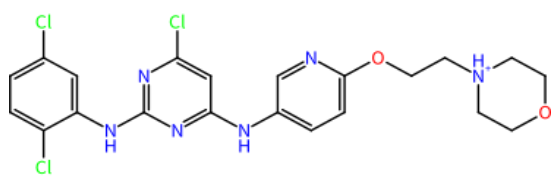

**Table S4.** HER3 inhibiting compounds generated from molecular editor and inspirator mode of SeeSAR via adding and replacing atoms and group of atoms. (The orange highlighted portion of compounds are representing fragments generated by ReCore).

| No | Structure of compounds                                                              | No | Structure of compounds                                                               |
|----|-------------------------------------------------------------------------------------|----|--------------------------------------------------------------------------------------|
| 6i | 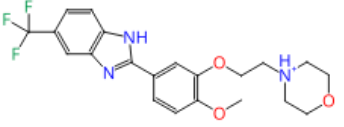   | 6j |    |
| 6k |    | 6l |    |
| 6m |    | 6n |    |
| 6o |   | 6p |   |
| 6q |  | 6r |  |
| 6s |  | 6t |  |
| 6u |  | 6v |  |
| 6w |  | 6x |  |

|    |  |    |  |
|----|--|----|--|
| 6y |  | 6z |  |
| 7a |  | 7b |  |
| 7c |  | 7d |  |
| 7e |  | 7f |  |
| 7g |  | 7h |  |
| 7i |  | 7j |  |
| 7k |  | 7l |  |
| 7m |  | 7n |  |
| 7o |  | 7p |  |
| 7q |  | 7r |  |



|    |  |    |  |
|----|--|----|--|
| 7s |  | 7t |  |
| 7u |  | 7v |  |
| 7w |  | 7x |  |
| 7y |  | 7z |  |
| 8a |  | 8b |  |
| 8c |  | 8d |  |
| 8e |  | 8f |  |
| 8g |  | 8h |  |
| 8i |  | 8j |  |
